# Supplementary material for: Fast-generation of Ag3PO4 concave microcrystals from electrochemical oxidation of bulk silver sheet
Source: Royal Society of Chemistry journal article supplement (doi:10.1039/c3ce40333e), 2013-01-01
Supplement: c3ce40333e.pdf [file c3ce40333e.pdf]

Supporting information

## Fast-generation of $\text{Ag}_3\text{PO}_4$ Concave Microcrystals from Electrochemical Oxidation of Bulk Silver Sheet

Zaizhu Lou,<sup>a</sup> Baibiao Huang,<sup>\*a</sup> Zeyan Wang,<sup>a</sup> Rui Zhang,<sup>a</sup> Yanmei Yang,<sup>a</sup> Xiaoyan Qin,<sup>a</sup> Xiaoyang Zhang,<sup>a</sup> and Ying Dai<sup>b</sup>

<sup>a</sup> State Key Laboratory of Crystal Materials, Shandong University, Jinan 250100, P. R. China.

Fax: (+86) 0531-8836-5969.

E-mail: [bbhuang@sdu.edu.cn](mailto:bbhuang@sdu.edu.cn).

<sup>b</sup> School of Physics, Shandong University, Jinan 250100, P. R. China.

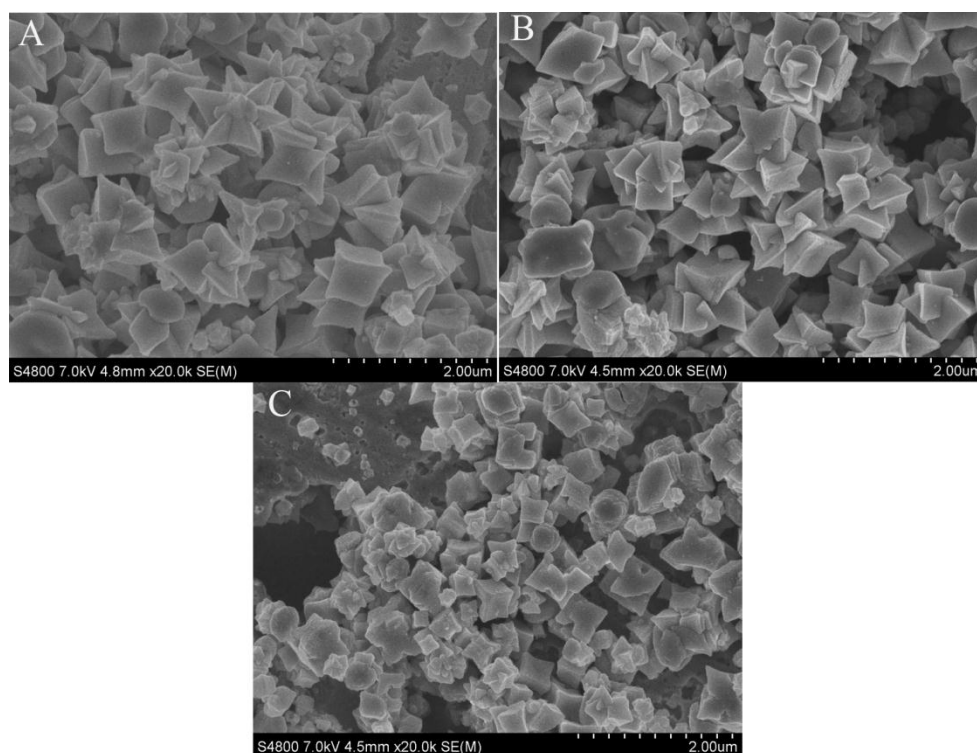

**S1.** SEM images of samples prepared with 2 V voltages added, 4 mM  $\text{Na}_3\text{PO}_4$  and different concentration of  $\text{Na}_2\text{SO}_4$ : 0.05 M (A), 0.1 M (B) and 0.2 M (C).

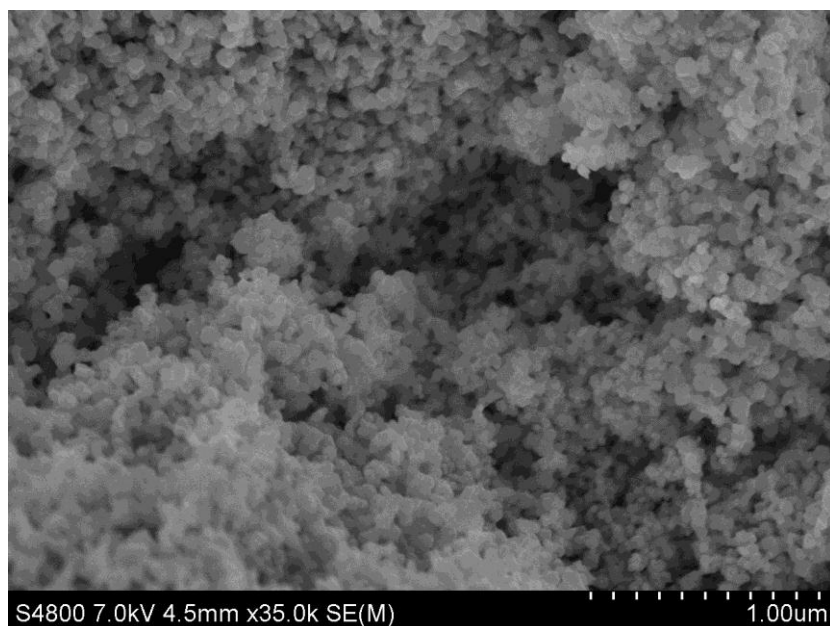

S2. SEM image of  $\text{Ag}_3\text{PO}_4$  irregular-shaped particles prepared by using the traditional precipitation method.

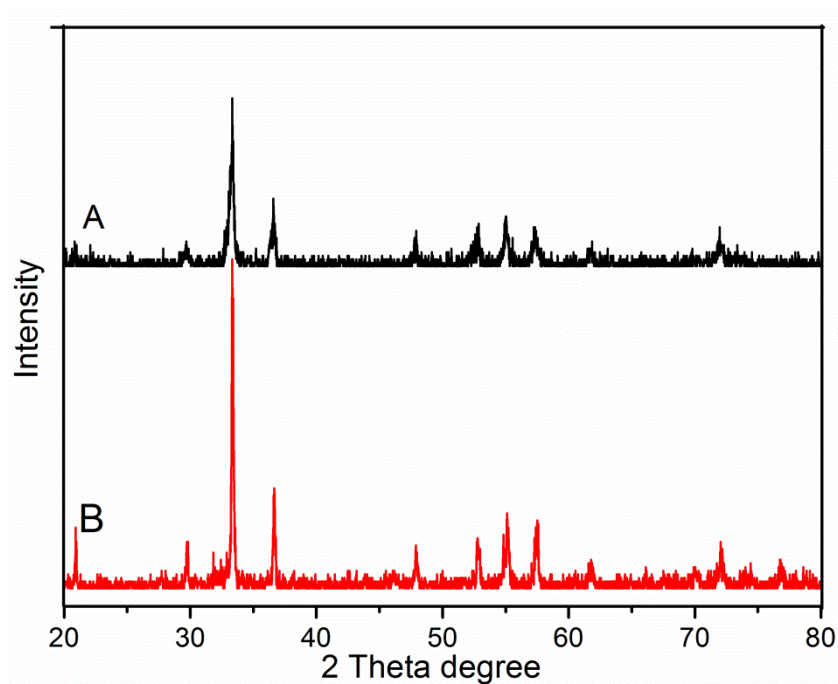

S3. XRD patterns of  $\text{Ag}_3\text{PO}_4$  concave microcrystals (B) and irregular-shaped particles (A).

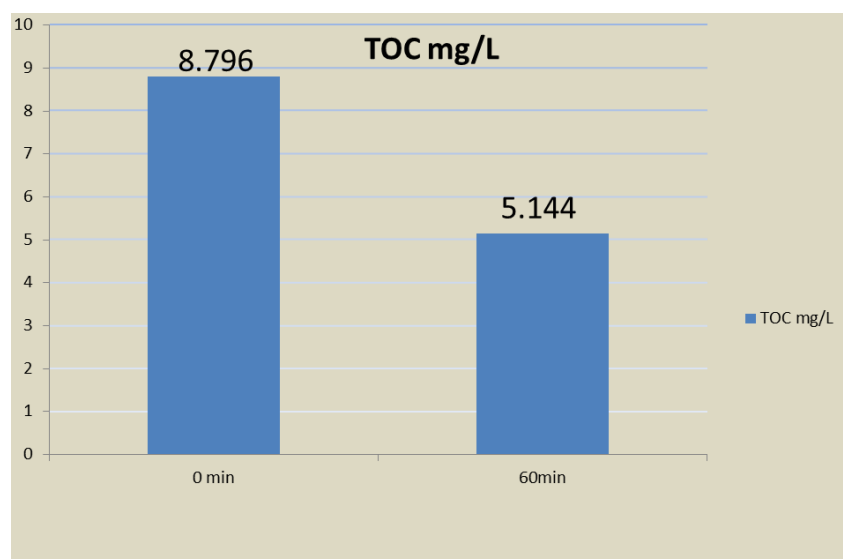

S4. TOC of MB solution during the photocatalytic reaction.

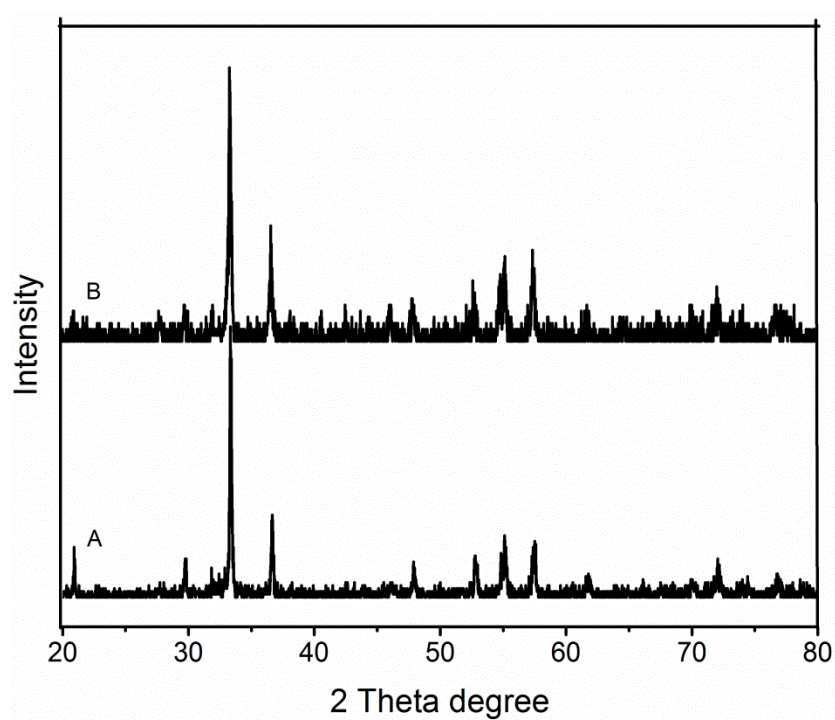

S5. XRD patterns of  $\text{Ag}_3\text{PO}_4$  concave microcrystals before (A) and after (B) photocatalytic reaction.

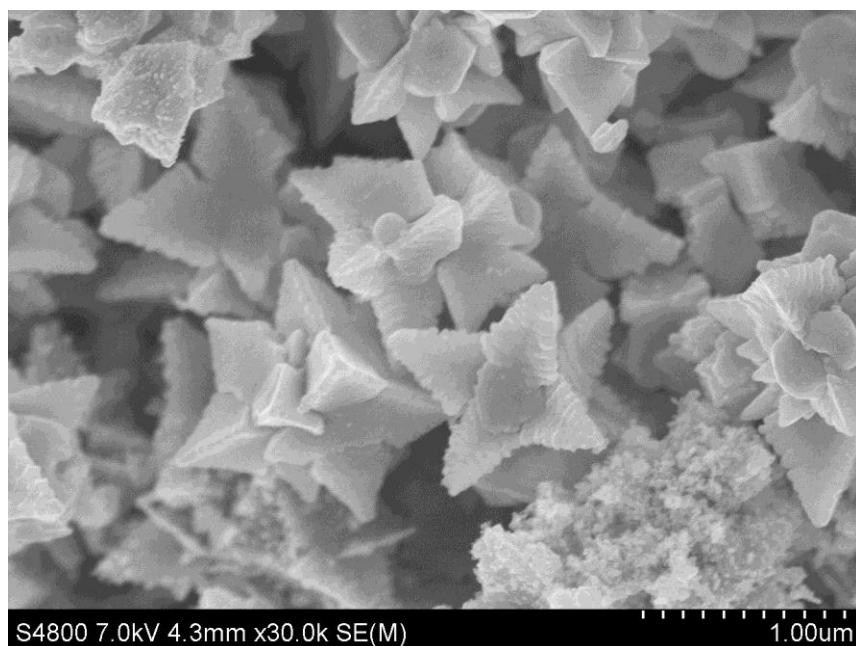

S6. SEM image of Ag<sub>3</sub>PO<sub>4</sub> concave microcrystals after photocatalytic reaction.

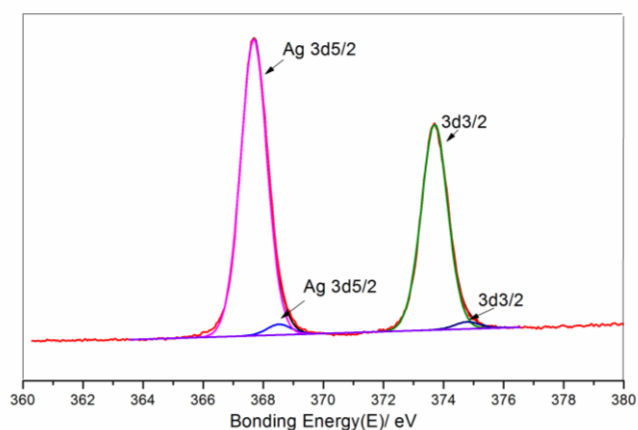

S7. The XPS spectra of Ag 3d of the Ag<sub>3</sub>PO<sub>4</sub> after photocatalytic reaction

As shown in the figure, Ag 3d spectra of Ag<sub>3</sub>PO<sub>4</sub> consisted of two individual peaks can be attributed to Ag 3d<sub>3/2</sub> and Ag 3d<sub>5/2</sub> binding energies, respectively. The Ag 3d<sub>3/2</sub> and Ag 3d<sub>5/2</sub> peaks can be further divided into two different peaks, respectively.

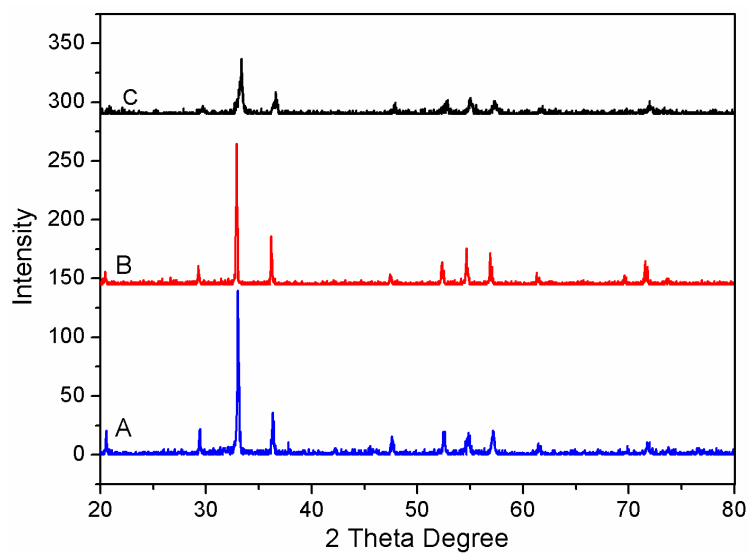

S8. The XRD patterns of samples: A) concave microcrystals, B) irregular-shaped samples 2 and C) irregular-shaped samples 1.

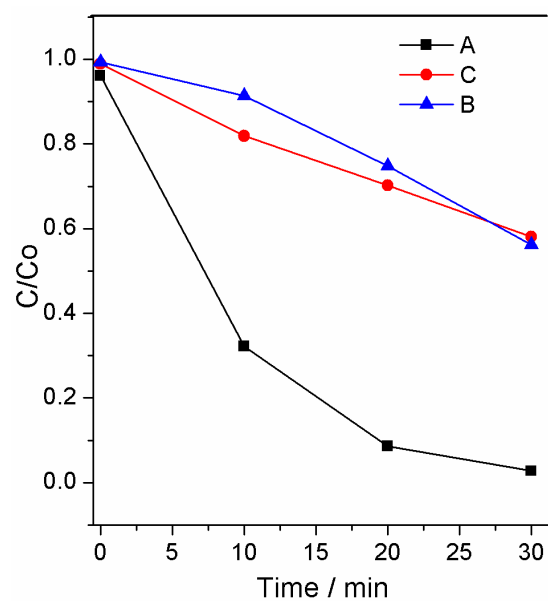

S9. The decomposition of MB using different photocatalysts : A) concave microcrystals, B) irregular-shaped samples 2 and C) irregular-shaped samples 1 under irradiation of visible light
